# Supplementary material for: Multinuclear Magnetic Resonance Spectroscopy at Ultra-High-Field: Assessing Human Cerebral Metabolism in Healthy and Diseased States
Source: MDPI journal article supplement (doi:10.3390/metabo13040577), 2023-04-19
Supplement: s1 [file s1]

**Table S1.** Comprehensive overview of all major brain diseases and corresponding cerebral metabolic alterations reported in UHF-MRS studies.

| Author                       | Disease Type | Population (n)                        | Target Region                     | Techniques & B0                   | Main Parameters                                   | Main Metabolic Alterations                                                                  |
|------------------------------|--------------|---------------------------------------|-----------------------------------|-----------------------------------|---------------------------------------------------|---------------------------------------------------------------------------------------------|
| Oeltzschner et al., 2019[82] | AD           | 13 controls & 13 MCI patients         | ACC & PCC                         | <sup>1</sup> H-MRS at 7T          | STEAM, TR=3000 ms, TE=14 ms in ACC & 15 ms in PCC | GABA, Glu & NAA reduced in PCC while MI increased in ACC.                                   |
| Marjanska et al., 2019[71]   | AD           | 33 controls & 16 AD patients          | PCC, OCC, WM                      | <sup>1</sup> H-MRS at 7T          | STEAM, TR/TE/TM=5000/8/32 ms                      | ASc increased in ACC & OCC, MI and tCho increased in PCC of AD patients.                    |
| Das et al., 2021[168]        | AD           | 15 controls, 15 aMCI & 11 AD patients | Frontal, parietal, temporal & OCC | <sup>31</sup> P-MRSI at 7T        | FID, TR=0.5 s, delay=0.5 ms.                      | Mg <sup>2+</sup> decreased in TL of AD, p-BEM decreased in aMCI.                            |
| Das et al., 2020[169]        | AD           | 19 aMCI patients                      | Parieto-occipital lobe            | <sup>31</sup> P-MRSI at 7T        | FID, TR=1-5 s, delay=0.5 ms,                      | higher BEM indices were associated with lower cognitive performance of memory in aMCI.      |
| Emir et al., 2012[65]        | PD           | 12 controls & 13 PD patients          | Pons, putamen & substantia nigra  | <sup>1</sup> H-MRS at 7T          | STEAM, TR/TE/TM=5000/8/32 ms                      | GABA increased in pons & putamen of PD.                                                     |
| Holmay et al., 2013[170]     | PD           | 3 controls & 3 Gaucher & 3 PD disease | OCC                               | <sup>1</sup> H-MRS at 7T          | sLASER, TR/TE=5000/ 26 ms                         | N-acetylcysteine infusion increased glutathione levels in brain and blood.                  |
| Atassi et al., 2017[66]      | ALS          | 12 controls & 13 ALS patients         | Left precentral gyrus             | <sup>1</sup> H-MRS at 7T          | STEAM, TR/TE/TM=5000/ 5/75 ms                     | tNAA, Glu & tCr reduced while MI increased in ALS patients.                                 |
| Cheong et al., 2017[171]     | ALS          | 17 controls & 19 ALS patients         | Primary motor cortex & pons       | <sup>1</sup> H-MRS at 7T          | sLASER, TR/TE=5000/ 26 ms                         | tNAA/MI ratio reduced in motor cortex & pons of ALS patients.                               |
| Cheong et al., 2018[172]     | ALS          | 19 controls & 20 patients             | Primary motor cortex & pons       | <sup>1</sup> H-MRS at 7T          | sLASER, TR/TE=5000/ 26 ms                         | Neurochemical changes are associated with functional decline.                               |
| Gonen et al., 2020[72]       | Epilepsy     | 10 controls, 19 TLE & 16 IGE patients | PCC                               | <sup>1</sup> H-MRS at 7T          | STEAM, TR/TE= 8500/6 ms                           | GSH increased in PCC of IGE patients.                                                       |
| Pan et al., 2013[178]        | Epilepsy     | 25 patients                           | Whole brain                       | 2D & 3D <sup>1</sup> H-MRSI at 7T | Hahn SE, TR/TE=1500/ 40 ms                        | MRSI-determined abnormality and surgical resection region is related to outcome prediction. |

|                                  |          |                                                                         |                                  |                                            |                                                               |                                                                                                                                              |
|----------------------------------|----------|-------------------------------------------------------------------------|----------------------------------|--------------------------------------------|---------------------------------------------------------------|----------------------------------------------------------------------------------------------------------------------------------------------|
| Voets et al., 2017[176]          | Epilepsy | 12 controls, 11 TLE patients                                            | Hippocampus                      | <sup>1</sup> H-MRS at 7T                   | sLASER, TR/TE=6000/ 36 ms                                     | Reduced Gln concentrations which correlated with impaired verbal memory performance.                                                         |
| Van Veenendaal et al., 2018[177] | Epilepsy | 20 controls & 10 patients                                               | Whole brain                      | <sup>1</sup> H-MRSI at 7T                  | sLASER, TR/TE 5520/38 ms                                      | Increased number of Glu and GABA connections (neurotransmitter network) in epilepsy patients.                                                |
| Reid et al., 2018[182]           | SCZ      | 26 controls & 23 patients                                               | ACC                              | <sup>1</sup> H-MRS at 7T                   | STEAM, TR/TE/TM = 10000/5/45 ms,                              | Glu & tNAA reduced in SCZ patients.                                                                                                          |
| Rowland et al., 2016[38]         | SCZ      | 29 controls & 27 patients                                               | ACC                              | <sup>1</sup> H-MRS at 7T                   | STEAM, TR/TE/TM = 3000/14/33 ms,                              | Lac increased in SCZ patients.                                                                                                               |
| Thakkar et al., 2016[183]        | SCZ      | 24 controls & 23 patients (first-degree) & 21 patients with chronic SCH | Basal ganglia and OCC            | <sup>1</sup> H-MRS at 7T                   | sLASER, TR/TE= 5000/36 ms<br>JDE-MEGAsLASER, TR/TE=5000/74 ms | Reduced GABA and Gln in OCC of SCZ patients.                                                                                                 |
| Brandt et al., 2016[184]         | SCZ      | 24 controls & 24 patients                                               | ACC                              | <sup>1</sup> H-MRS at 7T                   | STEAM, TR/TE/TM = 3000/14/28 ms,                              | Glu decreased in SCZ patients.                                                                                                               |
| Godlewska et al., 2021[185]      | SCZ      | 18 controls & 17 patients                                               | ACC, DLPFC & putamen             | <sup>1</sup> H-MRS at 7T                   | STEAM, TR/TE= 5000/11ms,                                      | Glu & Gln reduced in ACC but no change in DLPFC & putamen.                                                                                   |
| Kumar et al., 2020[186]          | SCZ      | 45 controls & 28 patients                                               | ACC, left insula & visual cortex | <sup>1</sup> H-MRS at 7T                   | STEAM, TR/TE/TM = 200017/17 ms                                | Glu, Gln & GSH reduced in ACC                                                                                                                |
| Limongi etl., 2021[190]          | SCZ      | 20 controls & 19 patients                                               | dACC, anterior insula (AI)       | <sup>1</sup> H-MRS at 7T                   | sLASER, TR/TE=7500/100 ms                                     | Inhibitory activity within the dACC decreased with Glu levels whereas inhibitory activity in both the dACC and AI increased with GSH levels. |
| Marsman et al., 2014[189]        | SCZ      | 23 controls & 17 patients                                               | PFC, POC                         | <sup>1</sup> H-MRS & GABA-edited MRS at 7T | sLASER, TR/TE=5000/28 ms, MEGAsLASER, TR/TE=4000/74 ms        | GABA/Cr ratio reduced in SCZ patients.                                                                                                       |
| Park et al., 2021[187]           | SCZ      | 27 healthy & 47 FEB patients                                            | dACC                             | <sup>1</sup> H-MRS at 7T                   | sLASER, TR/TE=7500/100 ms                                     | MRS Glu corelated with Receptor Specific Morphometric Signatures (RSMS)-NMDA receptor in FEB patients.                                       |

|                             |       |                                                 |                                                           |                           |                                          |                                                                                                                                                                          |
|-----------------------------|-------|-------------------------------------------------|-----------------------------------------------------------|---------------------------|------------------------------------------|--------------------------------------------------------------------------------------------------------------------------------------------------------------------------|
| Wijtenburg et al., 2021[70] | SCZ   | 38 controls, 40 SCZ & 11 first-degree relatives | ACC, DLPFC, CSO, thalamus and hippocampus                 | <sup>1</sup> H-MRS at 7T  | STEAM, TR/TE/TM = 3,000/14/33ms          | Multi-region differences in GABAergic and glutamatergic metabolites in SCZ, first-degree relatives and healthy controls.                                                 |
| Sandstrom et al., 2022[63]  | SCZ   | 20 controls & 10 patients                       | ACC, DLPFC, thalamus, hippocampus, and the basal ganglia. | <sup>1</sup> H-MRS at 7T  | sLASER, TR/TE=3600/30 ms                 | A randomized clinical trial explored the potential benefits of Memantine (a drug to treat AD and psychosis).                                                             |
| Dempster et al., 2020[191]  | SCZ   | 53 subjects                                     | Dorsal anterior cingulate cortex                          | <sup>1</sup> H-MRS at 7T  | sLASER, TR/TE=7500/100 ms                | No diff. in Glu & GSH levels between patients and controls. Glu is associated with severe functional impairment. Higher GSH is associated with shorter time to response. |
| Jeon et al., 2021[188]      | SCZ   | 10 controls & 21 patients                       | Dorsal anterior cingulate cortex                          | <sup>1</sup> H-MRS at 7T  | sLASER, TR/TE=7500/100 ms                | Glu reduced in patients and progressive level of Glu change is the best predictor to monitor treatment effect.                                                           |
| Wang et al., 2023[181]      | SCZ   | 48 controls & 38 patients                       | ACC, CSO, OFR, thalamus, DLPFC                            | <sup>1</sup> H-MRS at 7T  | STEAM, TR/TE/TM=3000/14/33 ms            | Glu reduced in both controls and patients in ACC. GABA, tcho, tcr, MI & NAA are reduced in ACC of patients. GSH nearly zero over time with treatment.                    |
| Wang et al., 2019[192]      | SCZ   | 91 controls & 81 patients                       | ACC, CSO, DLPFC, OFR & thalamus                           | <sup>1</sup> H-MRS at 7T  | STEAM, TR/TE/TM=3000/14/33 ms            | NAA reduced but no change in NAAG. Lower levels of Glu, GSH, GABA in ACC.                                                                                                |
| Lind et al., 2020[64]       | Aging | 60 healthy volunteers, age from 18 to 79 years  | Medial ACC, left DLPFC, left hippocampus & left thalamus  | <sup>1</sup> H-MRS at 7T  | sLASER, TR/TE=3700/32 ms                 | MI increased in hippocampus & thalamus. tCho and Cre increased in ACC & hippocampus. Glu decreased in DLPFC.                                                             |
| Marsman et al., 2013[156]   | Aging | 33 volunteers, age from 18 to 31 years old      | Medial frontal region                                     | <sup>1</sup> H-MRS at 7T  | STEAM, TR/TE/TM=2000/7/11 ms             | Glu reduced in older individuals.                                                                                                                                        |
| Schreiner et al., 2016[157] | Aging | 30 LEM elderly subjects (70 years old)          | posterior cingulate and precuneus (PCP)                   | <sup>1</sup> H-MRSI at 7T | FID-TR=644 ms, acquisition delay= 2.5 ms | MI, Cho, Glu-Gln altered between GM & WM. High tNAA associated with low verbal learning & memory.                                                                        |
| Marjanska et al., 2017[155] | Aging | 17 young adults (19-22 years) &                 | PCC & ACC                                                 | <sup>1</sup> H-MRS at 7T  | STEAM, TR/TE/TM=5000/8/32 ms             | Asc, Glu and NAA reduced in ACC. tCre and MI increased in PCC.                                                                                                           |

|                                   |         |                                     |                                                                    |                           |                                |                                                                                                                    |
|-----------------------------------|---------|-------------------------------------|--------------------------------------------------------------------|---------------------------|--------------------------------|--------------------------------------------------------------------------------------------------------------------|
|                                   |         | 16 older adults (70-88 years)       |                                                                    |                           |                                |                                                                                                                    |
| Tackley et al., 2021[173]         | MS      | 11 MS and 4 AQP4Ab-NMOSD patients   | NAWM, lesion                                                       | <sup>1</sup> H-MRS at 7T  | STEAM, TR/TE= 5000/11 ms       | Not much differences in neurochemical profiles                                                                     |
| Heckova et al., 2019[174]         | MS      | 20 patients, 77 lesions             | NAWM, lesion                                                       | <sup>1</sup> H-MRSI at 7T | FID, delay=1.3 ms              | 83% of lesion shows increased MI/ NAA in MS patients.                                                              |
| Srinivasan et al., 2010[175]      | MS      | 6 controls and 7 patients           | GM, WM                                                             | <sup>1</sup> H-MRSI at 7T | FID, TR=2000 ms                | GSH is reduced in GM but not in WM.                                                                                |
| Vingerhoets et al., 2019[201]     | 22q11.2 | One patient                         | ACC & Striatum                                                     | <sup>1</sup> H-MRS at 7T  | STEAM, TR/TE/TM=5000/6 /10ms   | Glu reduced in both ACC & striatum of 22q11.2 patients.                                                            |
| Vingerhoets et al., 2020[200]     | 22q11.2 | 17 patients & 20 controls           | ACC & striatum                                                     | <sup>1</sup> H-MRS at 7T  | STEAM, TR/TE/TM=5000/6 /10ms   | Riluzole decreased Glu in ACC of 22q11.2 patients.                                                                 |
| Hooijdonk et al., 2022[199]       | 22q11.2 | 17 patients & 20 controls           | ACC & striatum                                                     | <sup>1</sup> H-MRS at 7T  | STEAM, TR/TE/TM=5000/6/10ms    | An association between glutamatergic functioning and brain volume in healthy controls but not in 22q11.2 patients. |
| Puts et al., 2020[69]             | ADHD    | 24 controls & 26 with ADHD children | DLPFC, VMPFC, striatum, PMC                                        | <sup>1</sup> H-MRS at 7T  | STEAM, TR/TE/TM=3000/14/26 ms, | GABA reduced in striatum of patients with ADHD                                                                     |
| Van den Bogaard et al., 2011[83]  | HD      | 44 subjects                         | caudate nucleus, putamen, thalamus, hypothalamus, and frontal lobe | <sup>1</sup> H-MRS at 7T  | STEAM, TR/TE/TM=2000/19/25 ms  | NAA & Cre reduced in HD                                                                                            |
| Unschuld et al., 2012[179]        | HD      | 12 controls & 12 patients           | PCC                                                                | <sup>1</sup> H-MRS at 7T  | STEAM, TR/TE=3000/13 ms        | NAA & Glu reduced in HD                                                                                            |
| Van den Bogaard et al., 2014[180] | HD      | 13 patients- 2 years follow up      | caudate nucleus, putamen and PFC                                   | <sup>1</sup> H-MRS at 7T  | STEAM, TR/TE/TM=2000/19/25 ms  | Cre and MI reduced in caudate nucleus. NAA and Cho levels reduced in putamen of HD patients.                       |

|                             |                  |                                      |                                      |                                  |                                                            |                                                                                                                         |
|-----------------------------|------------------|--------------------------------------|--------------------------------------|----------------------------------|------------------------------------------------------------|-------------------------------------------------------------------------------------------------------------------------|
| Zielman et al., 2014[195]   | Migraine         | 19 controls & 18 patients            | Cerebellum, OCC, pons & hypothalamus | <sup>1</sup> H-MRS at 7T         | STEAM, TR/TM/TE =2000/19/21 ms                             | Decreased tNAA/Cre ratio                                                                                                |
| Zielman et al., 2017[194]   | Migraine         | 24 controls & 50 patients            | Primary & secondary visual cortex    | <sup>1</sup> H-MRS& DW-MRS at 7T | sLASER, TR/TE=5000/30 ms. DW-MRS: PRESS, TR/TE=2000/120 ms | Glu increased in visual cortex                                                                                          |
| Godlewska et al., 2017[196] | Anorexia Nervosa | 12 controls & 13 patients            | ACC, OCC & putamen                   | <sup>1</sup> H-MRS at 7T         | STEAM, TR/TE=5000/11 ms                                    | Glu reduced in all three voxels of AN patients. Inositol reduced in ACC & OCC.                                          |
| Taylor et al., 2015[193]    | MDD & SCZ        | 16 controls, 16 SCH, 16 MDD patients | ACC                                  | <sup>1</sup> H-MRS&f-MRS at 7T   | STEAM, TR/TE/TM=3000/10/32 ms                              | Gln increase in SCZ during first run of task. Glu reduced in MDD during second run of task.                             |
| Emir et al., 2016[75]       | Tumor            | 8 controls & 14 glioma patients      | Tumor region                         | <sup>1</sup> H-MRS at 7T         | sLASER, TR=5000- 6000 ms, TE=110 ms                        | 2-HG detectable and increased in tumor patients.                                                                        |
| Ganji et al., 2017[163]     | Tumor            | 12 patients                          | Tumor region                         | <sup>1</sup> H-MRS at 7T         | PRESS, TR/TE=2500/78 ms                                    | Optimized PRESS at TE=78 enables to detect 2-HG in tumor patients.                                                      |
| Gruber et al., 2017[90]     | Tumor            | 10 controls & 2 glioma patients      | Frontal, Parietal & occipital cortex | <sup>1</sup> H-MRSI at 3T&7T     | FID-TR=600 ms, delay=1.5 ms                                | MRSI allow fast and reliable metabolite maps in approximately 6 minutes at 7 T than in approximately 30 minutes at 3 T. |
| Li et al., 2015[166]        | Tumor            | 29 glioma patients                   | Tumor & healthy tissue               | <sup>1</sup> H-MRSI at 7T        | SE, TR/TE=2000/30 ms                                       | Gln, MI, glycine & GSH increased while tNAA reduced in tumor regions.                                                   |
| Verma et al., 2016[164]     | Tumor            | 9 patients                           | Tumor region                         | 2D L-COSY at 7T                  | 2D-COSY sequence, TR/TE=2000/20 ms                         | 2-HG detected in patients                                                                                               |
| Bisdas et al., 2016[167]    | Tumor            | 18 patients                          | Tumor region                         | <sup>1</sup> H-MRSI at 9.4T      | STEAM, TR/TE/TM=2000/20/11 ms                              | Glu & Gln pool reduced and 2-HG detection in patients.                                                                  |
| Berrington et al., 2017[74] | Tumor            | 9 patients                           | Tumor region                         | <sup>1</sup> H-MRS at 3T & 7T    | sLASER, TR/TE=5000-6000/110 ms                             | 2HG detection and comparison at 3T & 7T.                                                                                |

|                         |                |                                      |                |                          |                                |                                                                                                                                                      |
|-------------------------|----------------|--------------------------------------|----------------|--------------------------|--------------------------------|------------------------------------------------------------------------------------------------------------------------------------------------------|
| Shen et al., 2019[165]  | Tumor          | 20 patients                          | Tumor region   | <sup>1</sup> H-MRS at 7T | sLASER, TR/TE=5000-6000/110 ms | IDH2 mutants have higher 2HG and MI.                                                                                                                 |
| Mason et al., 2019[197] | Drug addiction | 20 healthy occasional cannabis users | ACC & striatum | <sup>1</sup> H-MRS at 7T | STEAM, TR/TE/TM=5000/6/10 ms   | Glu increased in striatum after an acute dose of cannabis.                                                                                           |
| Mason et al., 2021[198] | Drug addiction | 12 occasional & 12 cannabis users    | ACC & Striatum | <sup>1</sup> H-MRS at 7T | STEAM, TR/TE/TM=5000/6/10 ms   | In occasional users, acute dose of cannabis increased Glu in striatum and associated with reward circuitry but such changes absent in chronic users. |

**Supplementary Table S1:** Comprehensive overview of all major brain diseases and corresponding cerebral metabolic alterations reported in UHF-MRS studies. ACC-anterior cingulate cortex, PCC-posterior cingulate cortex, MCI-mild cognitive impairment, OCC-occipital cortex, TLE-temporal lobe epilepsy, DLFPC- dorsolateral prefrontal cortex, POC-parieto-occipital cortex, FEP-first-episode psychosis, CSO- centrum semiovale, OFR- Orbitofrontal region, VMPFC- ventromedial prefrontal cortex, MDD- major depressive disorder, LEM- low episodic memory, FID-free induction decay, TL- temporal lobe, p-BEM- phosphate brain energy metabolism, SCZ-Schizophrenia, NMDA- N-methyl D- aspartate. NAWM- normal appearing grey matter.
